# Supplementary material for: The Effect of Species Soybean Vein Necrosis Orthotospovirus (SVNV) on Life Table Parameters of Its Vector, Soybean Thrips (Neohydatothrips variabilis Thysanoptera: Thripidae)
Source: Insects. 2022 Jul 14;13(7):632. doi: 10.3390/insects13070632 (PMC9324745; doi:10.3390/insects13070632)
Supplement: Supplementary file 1 [file insects-13-00632-s001.zip › insects-1760878-supplementary.pdf]

**Table S1.** List of the primers used for detection of virus.

| Gene     | Gene title                                 | Primer sequence (5' to 3', forward/reverse)                              | Genbank acc.no | Product size |
|----------|--------------------------------------------|--------------------------------------------------------------------------|----------------|--------------|
| GmELF1-b | Glycine max Elongation factor 1            | ACTCTGCACTCACCAC<br>TGCC/AGGAAAGCTTG<br>GAGCAAGTTGAG<br>GGAAGCTTACCCCTTC | XM_003545405   | 247          |
| SVNV-NP  | Nucleocapsid Protein                       | TGGC/ACTCCTCTCATT<br>TGGGGTGC                                            | GU722322       | 239          |
| SVNV-NSs | Non-structural silencing protein           | TGATGACCACGAAAG<br>GGTCT/AACAACCAGA<br>TGCGGAACCT                        | GU722319.1     | 191          |
| NV COI   | N. variabilis Cytochrome C oxidase subunit | GGATTTATTGTTTGAG<br>CACACCAC/TCCTGTC<br>AATCCTCCTAATGTGA                 | EF523586       | 216          |

**Table S2.** Relative quantification of SVNV in the infected and uninfected plants and thrips population.

| Treatment/<br>biological replicate | Gene             | Avg. Cq | Melting temperature | Virus detected/not |
|------------------------------------|------------------|---------|---------------------|--------------------|
| Healthy thrips                     | SVNV-NSs         | NaN     | None                | N.D                |
| Healthy thrips                     | SVNV-NSs         | NaN     | None                | N.D                |
| Infected Thrips                    | SVNV-NSs         | 23      | 79                  | D                  |
| Infected Thrips                    | SVNV-NSs         | 19      | 79.5                | D                  |
| Water                              | SVNV-NSs         | NaN     | None                | N.D                |
| Healthy thrips                     | SVNV-NP          | NaN     | None                | N.D                |
| Infected Thrips                    | SVNV-NP          | 22      | 80.5                | D                  |
| Infected Thrips                    | SVNV-NP          | 19.93   | 80.5                | D                  |
| Water                              | SVNV-NP          | NaN     | None                | N.D                |
| Healthy thrips                     | NV COI           | 21      | 75.5                | D                  |
| Healthy thrips                     | NV COI           | 21      | 75.5                | D                  |
| Infected Thrips                    | NV COI           | 25      | 75.5                | D                  |
| Infected Thrips                    | NV COI           | 21      | 75.5                | D                  |
| Water                              | NV COI           | NaN     | None                | N.D                |
| Healthy plant                      | SVNV-NSs         | NaN     | None                | N.D                |
| Healthy plant                      | SVNV-NSs         | NaN     | None                | N.D                |
| Healthy plant                      | SVNV-NSs         | NaN     | None                | N.D                |
| Infected Plant                     | SVNV-NSsSVNV-NSs | 14      | 79                  | D                  |
| Infected Plant                     | SVNV-NSs         | 13      | 79.5                | D                  |
| Infected Plant                     | SVNV-NSs         | 12      | 79.5                | D                  |
| Healthy plant                      | SVNV-NP          | NaN     | None                | N.D                |
| Healthy plant                      | SVNV-NP          | NaN     | None                | N.D                |
| Healthy plant                      | SVNV-NP          | NaN     | None                | N.D                |
| Infected Plant                     | SVNV-NP          | 12      | 80.5                | D                  |
| Infected Plant                     | SVNV-NP          | 12      | 80.5                | D                  |
| Infected Plant                     | SVNV-NP          | 13      | 80.5                | D                  |
| Healthy plant                      | GmELF1-b         | 26      | 81.5                | Host plant gene    |
| Healthy plant                      | GmELF1-b         | 25      | 81.5                | Host plant gene    |
| Healthy plant                      | GmELF1-b         | 33      | 81.5                | Host plant gene    |
| Healthy plant                      | GmELF1-b         | 26      | 81.5                | Host plant gene    |
| Healthy plant                      | GmELF1-b         | 26      | 81.5                | Host plant gene    |

|                 |          |     |      |                 |
|-----------------|----------|-----|------|-----------------|
| Healthy plant   | GmELF1-b | 29  | 81   | Host plant gene |
| Healthy plant   | GmELF1-b | 26  | 81.5 | Host plant gene |
| Infected Plant  | GmELF1-b | 22  | 81.5 | Host plant gene |
| Healthy thrips  | SVNV-NSs | NaN | None | N.D             |
| Healthy thrips  | SVNV-NSs | NaN | None | N.D             |
| Infected Thrips | SVNV-NSs | 23  | 79   | D               |
| Infected Thrips | SVNV-NSs | 19  | 79.5 | D               |

**Table S3.** List of acronyms and terminologies used in the paper.

| Acronym               | Formula                                                                           | Description                                                                                                                                                                                                                                              |
|-----------------------|-----------------------------------------------------------------------------------|----------------------------------------------------------------------------------------------------------------------------------------------------------------------------------------------------------------------------------------------------------|
| Ndx                   |                                                                                   | The number of individuals from the original cohort die during the interval (x to x+n), out of the total number of individuals at the beginning of the table.                                                                                             |
| Lx                    |                                                                                   | Proportion of individual surviving; the cumulative probability of survival at the beginning of time interval.                                                                                                                                            |
| Npx<br>lx+1<br>100 qx | $np_x = 1 - nq_x$<br>$l_x * p_x$                                                  | The probability of surviving the period.                                                                                                                                                                                                                 |
| Lx                    | $L_x \approx (l_x + l_{x+1})/2$                                                   | Percent probability of death<br>Average proportion alive at a particular age                                                                                                                                                                             |
| Tx                    | $L_x + L_{x+1} + \dots + L_{x+n}$<br>cumulative number of days lived beyond age x |                                                                                                                                                                                                                                                          |
| GRR                   | $\Sigma m_x$                                                                      | Gross reproduction rate. It is sum of all eggs produced during the time period by reproductive females                                                                                                                                                   |
| 'ex'                  | $(T_x/l_x)$                                                                       | The average number of days yet to be lived by members surviving to a particular age (x)                                                                                                                                                                  |
| Ro                    | $\Sigma l_x.m_x$                                                                  | Ro is the replacement rate. If $Ro < 1$ , the population is shrinking. If $Ro > 1$ the population is increasing. If $Ro = 1$ it means that population is constant.                                                                                       |
| 'dfx'                 |                                                                                   | Mortality factor responsible for dx                                                                                                                                                                                                                      |
| mx                    |                                                                                   | Eggs produced per surviving stage or average eggs produced per female                                                                                                                                                                                    |
| Fx                    |                                                                                   | Eggs produced per day or per each age                                                                                                                                                                                                                    |
| R                     | $\ln Ro / T_c$                                                                    | Intrinsic rate of natural increase of population. rate of intrinsic increase = $\Sigma e^{7-rm_x} \cdot L_x m_x$ . When the $r=0$ , the population is stable. If $r>0$ the population is increasing, if $r<0$ the population is decreasing or shrinking. |
| DT                    | $(\ln 2)/r_m$                                                                     | Population doubling time                                                                                                                                                                                                                                 |
| B                     | $1/\Sigma e^{-rm_x} l_x$                                                          | Intrinsic birth rate                                                                                                                                                                                                                                     |
| 'dr'                  | $b - r_m$                                                                         | Intrinsic death rate                                                                                                                                                                                                                                     |
| T                     | $\Sigma x * (l_x.m_x) / \Sigma (l_x * m_x)$                                       | Generation time                                                                                                                                                                                                                                          |

|                     |             |                                                                                                                                                              |
|---------------------|-------------|--------------------------------------------------------------------------------------------------------------------------------------------------------------|
| Lambda( $\lambda$ ) | Antilog erm | Finite rate of increase in number                                                                                                                            |
| Ndx                 |             | The number of individuals from the original cohort die during the interval (x to x+n), out of the total number of individuals at the beginning of the table. |
| Npx                 | npx=1-nqx   | The probability of surviving the period.                                                                                                                     |
